# Supplementary material for: Evolution and diversification of the plant gibberellin receptor GID1
Source: PubMed Central journal article supplement — Proc Natl Acad Sci U S A. 2018 Aug 1;115(33):E7844–53. doi: 10.1073/pnas.1806040115 (PMC6099883; doi:10.1073/pnas.1806040115), 2018-08-01
Supplement: pnas.1806040115.sapp.pdf [file pnas.1806040115.sapp.pdf]

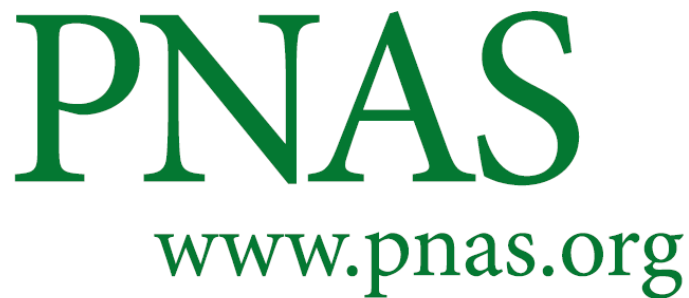

## Supplementary Information for

Evolution and diversification of the plant gibberellin receptor GID1

Hideki Yoshida, Eiichi Tanimoto, Takaaki Hirai, Yohei Miyanoiri, Rie Mitani, Mayuko Kawamura, Mitsuhiro Takeda, Sayaka Takehara, Ko Hirano, Masatsune Kainosho, Takashi Akagi, Makoto Matsuoka, and Miyako Ueguchi-Tanaka

Makoto Matsuoka

Email: makoto@agr.nagoya-u.ac.jp

Miyako Ueguchi-Tanaka

Email: mueguchi@nuagr1.agr.nagoya-u.ac.jp

### **This PDF file includes:**

Figs. S1 to S19

Tables S1 to S3

Captions for databases S1 to S4

### **Other supplementary materials for this manuscript include the following:**

Datasets S1 to S4

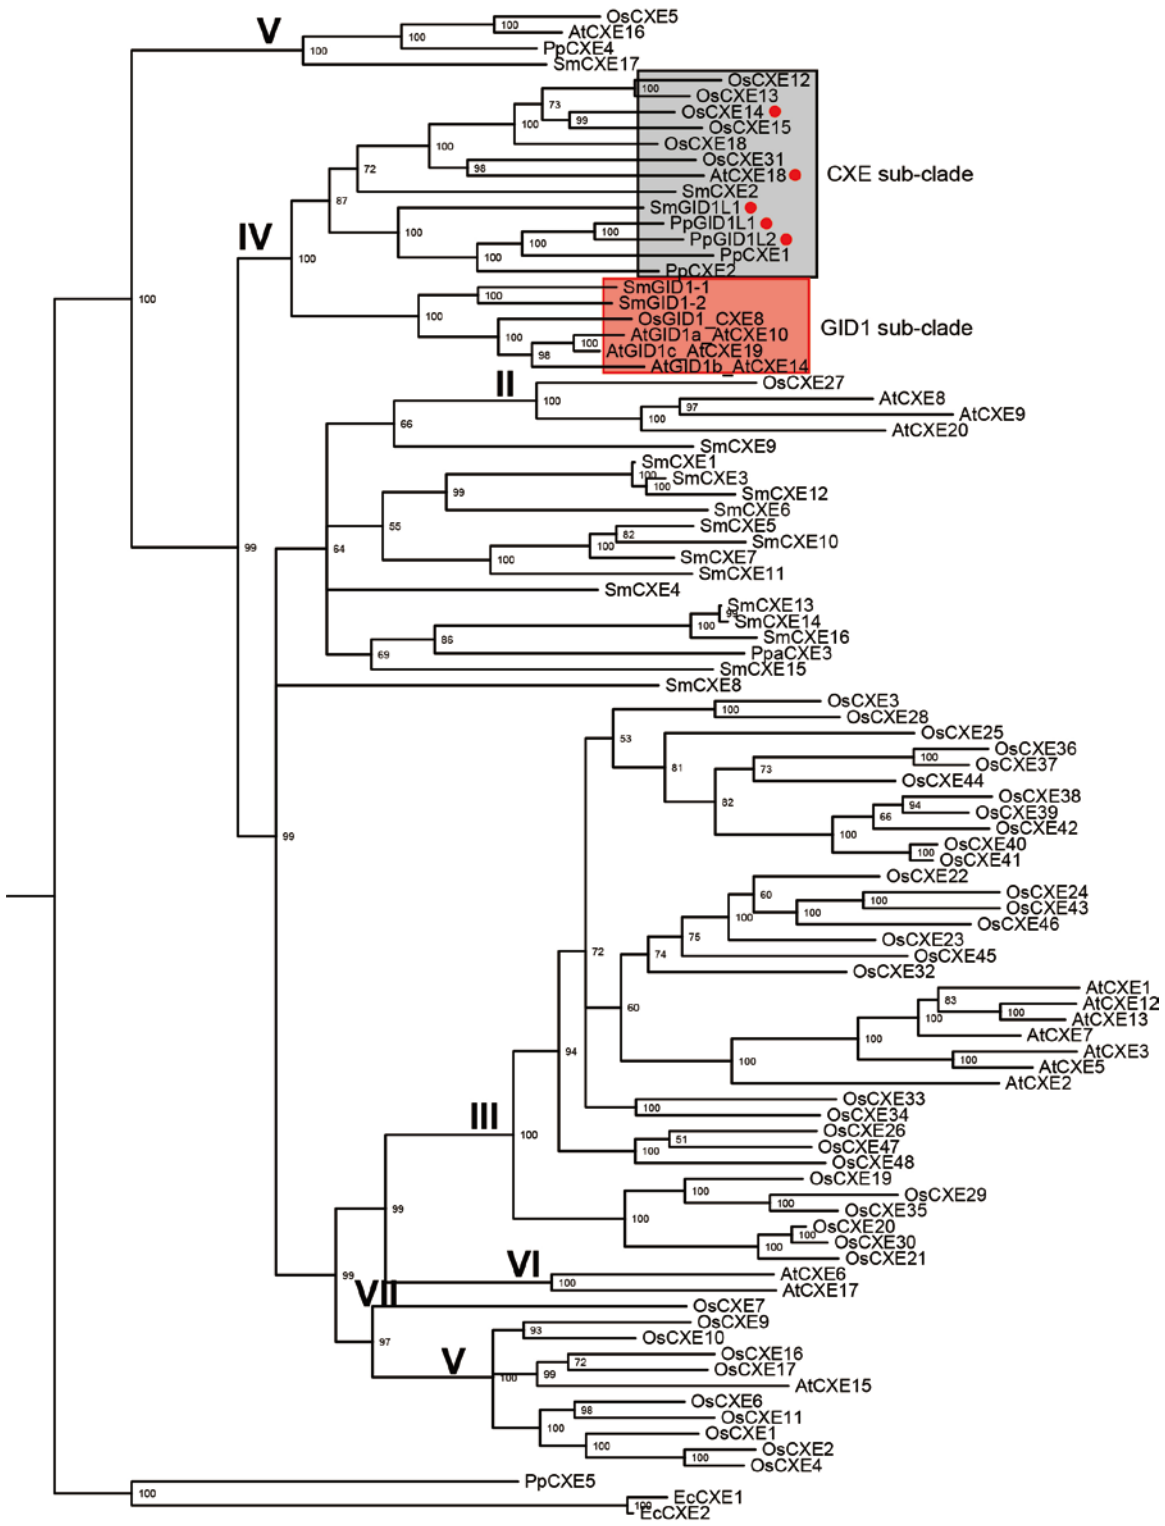

0.3

**Fig. S1.** Phylogenetic analysis of CXEs including GID1s in *A. thaliana* (At), rice (Os), *S. moellendorffii* (Sm), and *P. patens* (Pp), by Bayesian phylogenetic analysis based on the alignment presented in *SI Appendix*, Dataset S1. Branch nodes show posterior probability, and the horizontal branch lengths are proportional to the estimated number of amino acid substitutions per residue. The seven clades reported by Marshall et al. (17) are labeled by roman numerals. GID1s in red box and GID1-like CXEs in grey boxes are grouped into clade IV. The CXEs and GID1-likes (GID1L), marked by red dots, were used for further analysis. Bacterial CXEs, WP\_061301181.1 (*E. coli* CXE1; EcCXE1) and WP\_060616723.1 (EcCXE2), were used as out-groups.

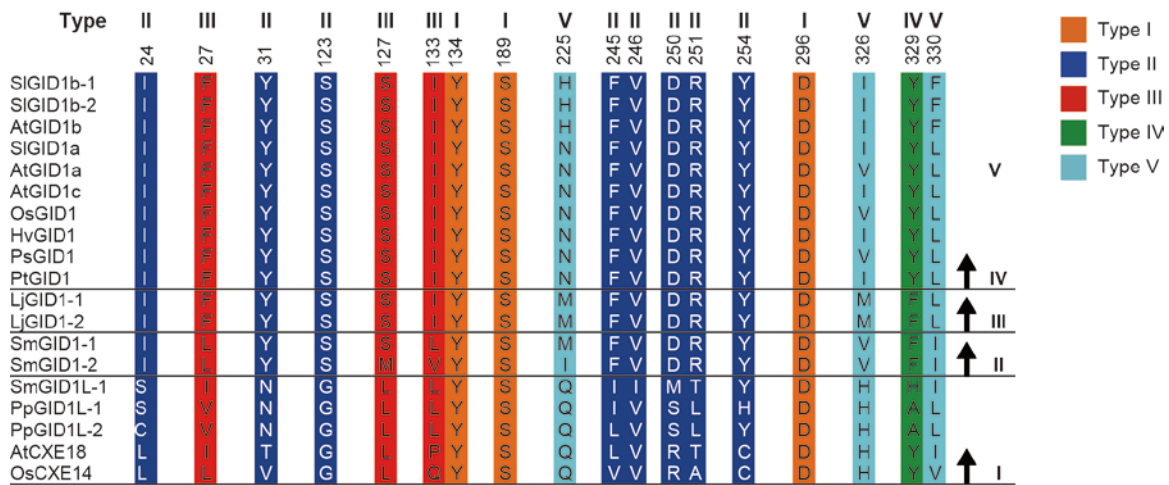

**Fig. S2.** Amino acid alignment of OsGID1, which interacts with GA<sub>4</sub>. An alignment of entire amino acid sequences is presented in *SI Appendix*, Dataset S1. The alignment includes monocot GID1s from rice (Os) and barley (Hv); eudicot GID1s from *A. thaliana* (At) and tomato (Sl); gymnosperm GID1s from *Picea sitchensis* (Ps), and *Pinus taeda* (Pt); fern GID1s from *L. japonica* (Lj); lycophyte GID1s from *S. moellendorffii* (Sm); and GID1-like CXEs from *P. patents* (PpGID1L-1 and PpGID1L-2), *S. moellendorffii* (SmGID1L-1), AtCXE18, and OsCXE14.

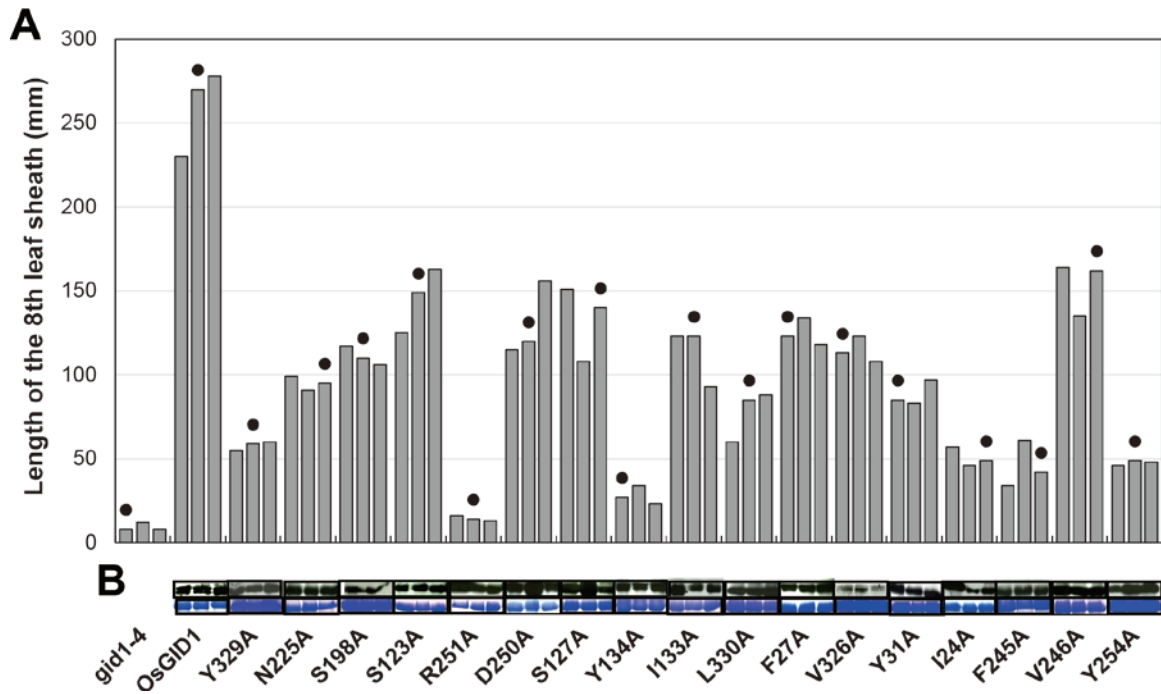

**Fig. S3.** Effect of replacement of GA<sub>4</sub>-interacting amino acids with Ala on the OsGID1 activity (A) Length of the 8<sup>th</sup> leaf sheath of three independent *gid1* plants overexpressing the indicated mOsGID1s. We used plants having nearly the same amount of GID1 protein (marked with dots). (B) Western blot analysis with  $\alpha$ OsGID1-antibody to confirm that the plants expressed a similar amount of mOsGID1 (upper panel). Lower panel shows the loading control.

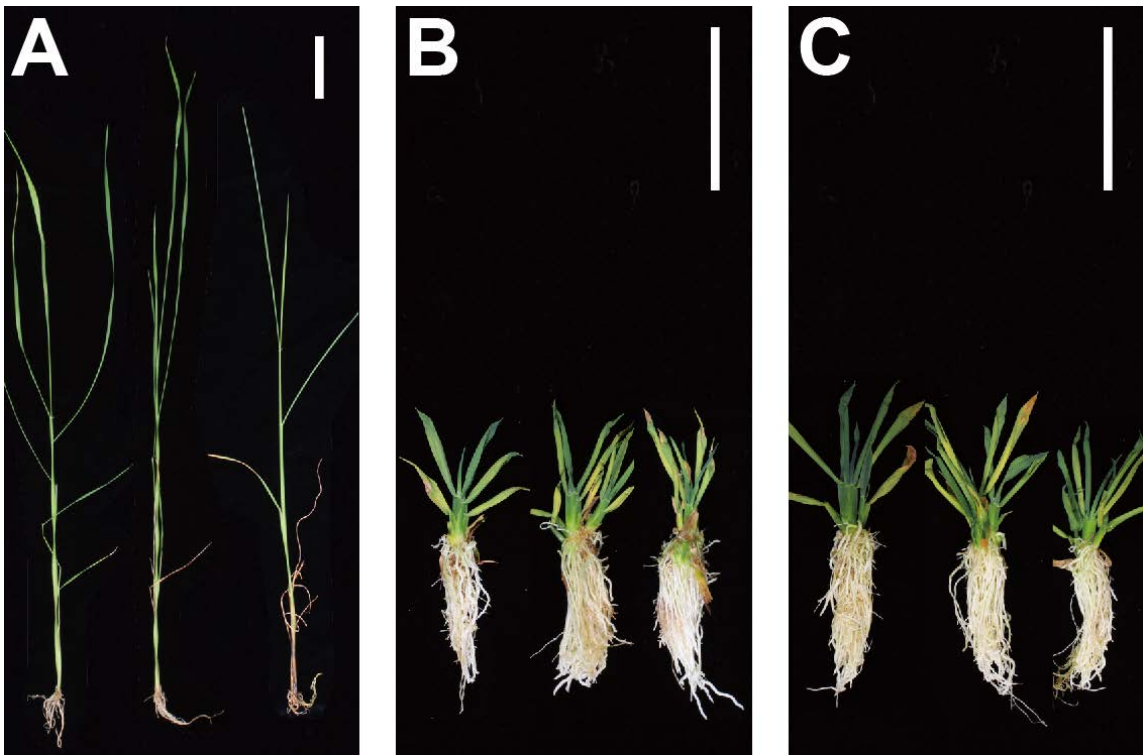

**Fig. S4.** Ala or Ser substitution of six non-polar amino acids abrogates rescue of *gid1* dwarfism. (A) *gid1* expressing the wild type OsGID1. (B and C) mOsGID1 replaced with Ala (B) or Ser (C). The six replaced residues are indicated in red in *SI Appendix*, Dataset S1. Scale bars indicate 5 cm.

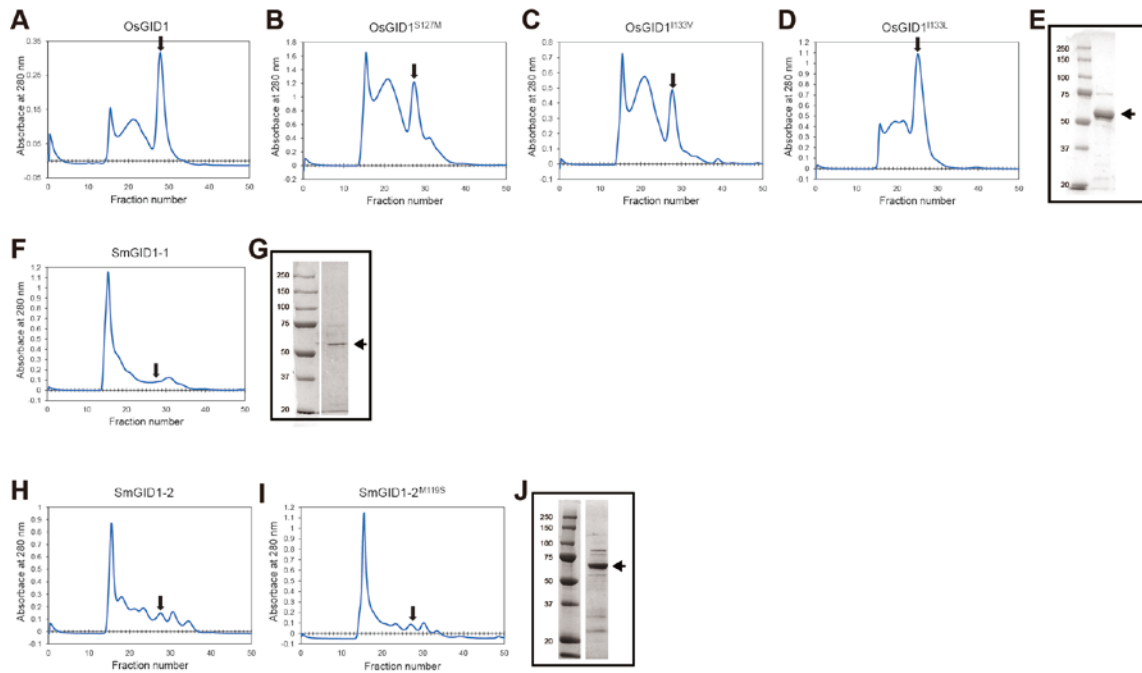

**Fig. S5.** Gel filtration profiles of the various GID1s used for the binding affinity experiment presented in Fig. 2c. (A–D), OsGID1 and its variants. (E) SDS-PAGE profile of OsGID1. (F, G) SmGID1-1 and its SDS-PAGE profile of SmGID1-1. (H–J) SmGID1-2, its variant and SDS-PAGE profile of SmGID1-2. Arrows in the gel filtration profiles indicate the peak positions of GID1s, which were used for the SDS-PAGE and binding affinity experiments. Numbers in the SDS-PAGE profile indicate kDa.

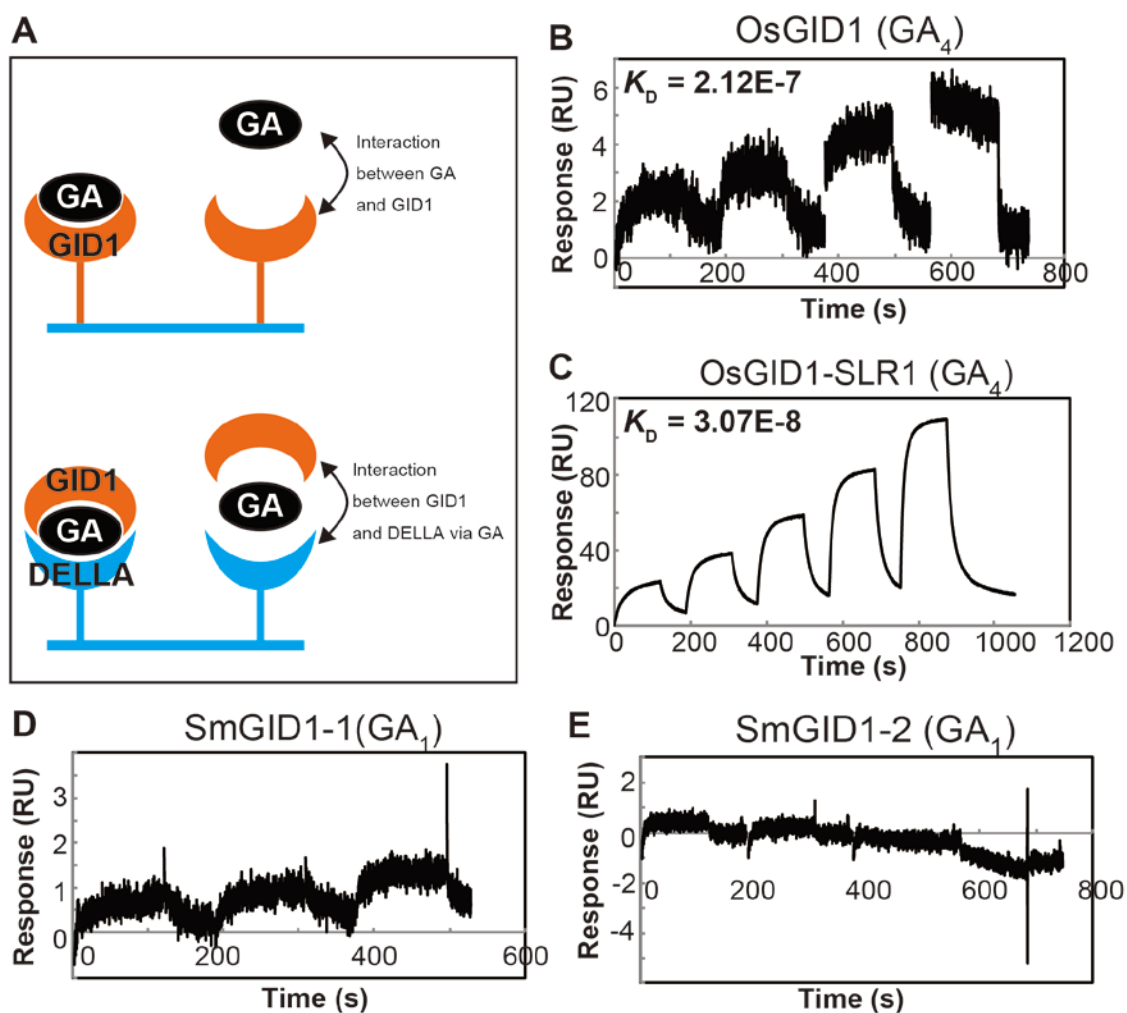

**Fig. S6.** Effect of  $K_D$  of GAs to GID1s through the measurement of the DELLA–GID1 interaction at various GA concentrations under excess GID1 and DELLA by SPR. (A) Schematic diagram of SPR analysis to evaluate the GA–GID1 interaction by direct interaction between GA and GID1 without DELLA protein (upper) or by interaction between GID1 and DELLA via GA (lower). (B, C) Sensorgrams of SPR for GA<sub>4</sub>–OsGID1 interaction estimated by the direct method without SLR1 (B), or by indirect method estimated by OsGID1–SLR1 interaction via GA<sub>4</sub> (C). Binding affinity ( $K_D$ ) estimated by the indirect method was 6.9 times higher than that by the direct method (2.12E-7 vs. 3.07E-8), with a more reliable sensorgram. (D, E) Sensorgrams of GA<sub>1</sub>–SmGID1-1 (D) and GA<sub>1</sub>–SmGID1-2 (E) interaction by the direct method. Binding affinities of GA<sub>1</sub>–SmGID1-1 and GA<sub>1</sub>–SmGID1-2 could hardly or not be estimated by the direct method.



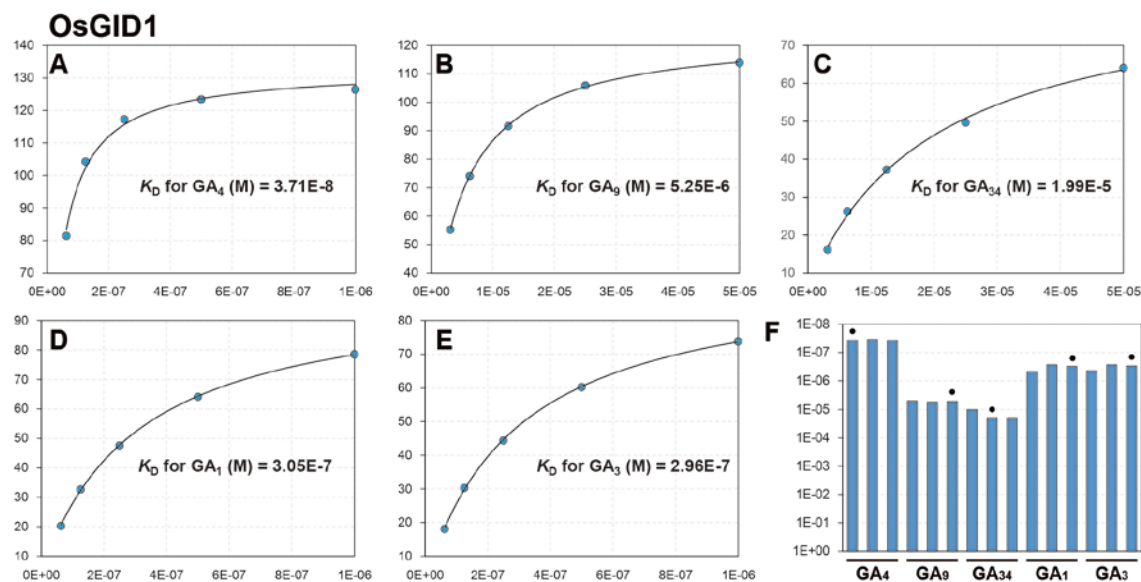

**Fig. S7.** Estimation of OsGID1–GA interaction affinities. (A–E), Equilibrium curves of the OsGID1–SLR1 interaction at various concentration of  $GA_4$  (A),  $GA_9$  (B),  $GA_{34}$  (C),  $GA_1$  (D), and  $GA_3$  (E).  $K_D$  was estimated by fitting equilibrium-binding data using a one-site-specific binding model. **f**, We performed three experiments for each GID1–GA combination to calculate the  $K_D$  value and adopted the median value as the representative one shown in Fig. 2C.

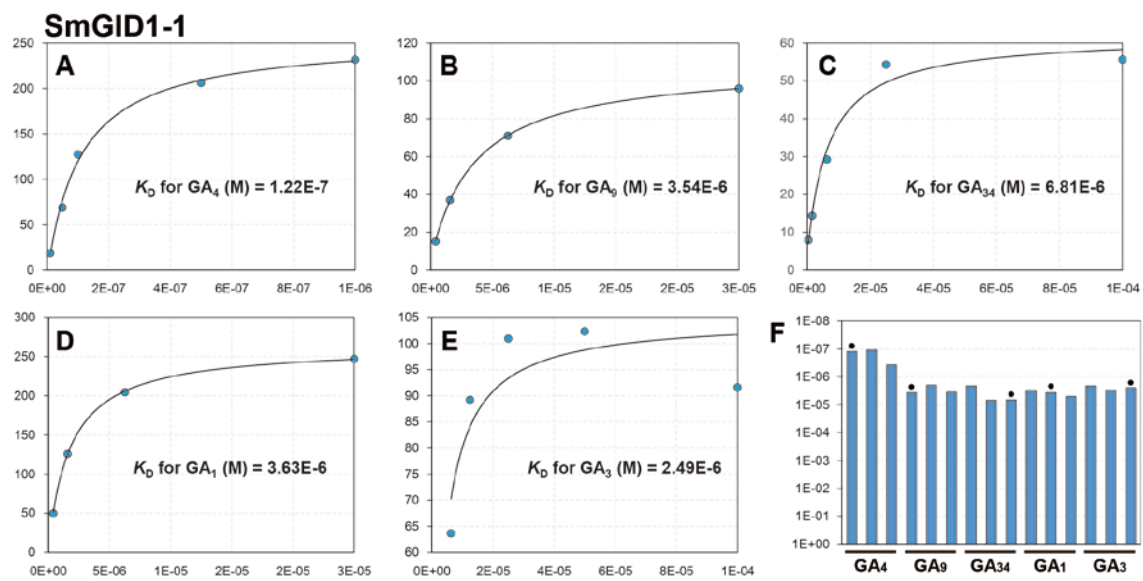

**Fig. S8.** Estimation of the SmGID1-1–SmDELLA1 interaction affinity. Experimental conditions are the same as in *SI Appendix*, Fig. S7.

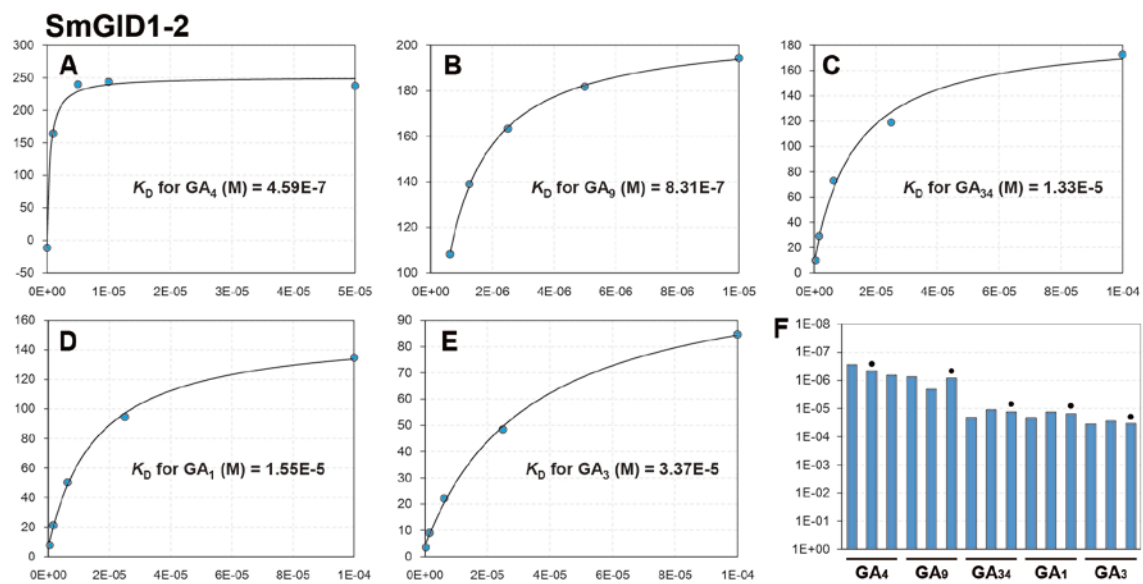

**Fig. S9.** Estimation of the SmGID1-2–SmDELLA1 interaction affinity. Experimental conditions are the same as in *SI Appendix*, Fig. S7.

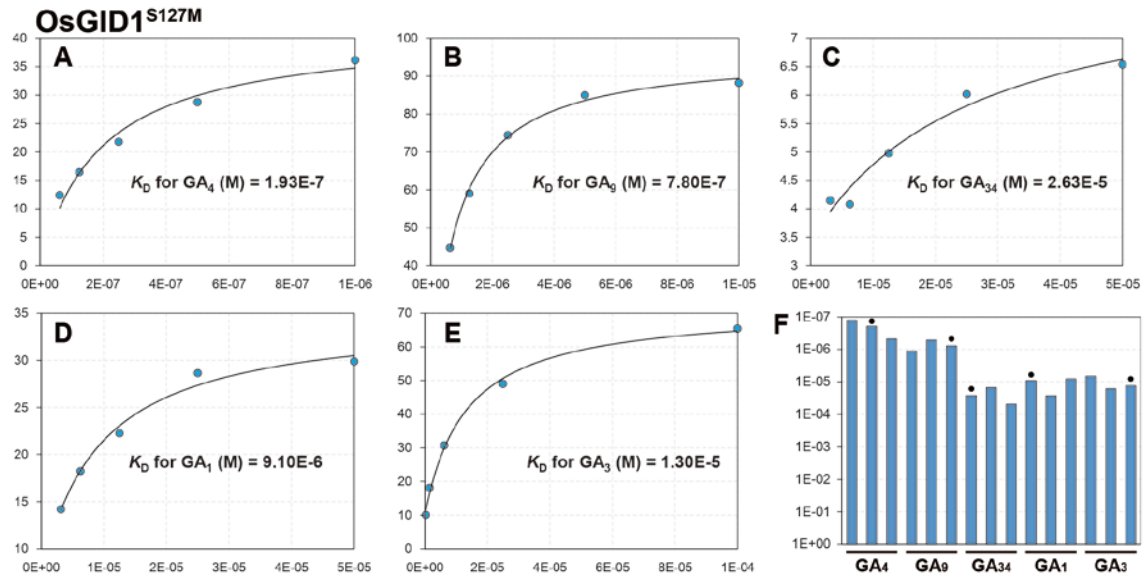

**Fig. S10.** Estimation of the OsGID1<sup>S127M</sup>-SLR1 interaction affinity. Experimental conditions are the same as in *SI Appendix*, Fig. S7.

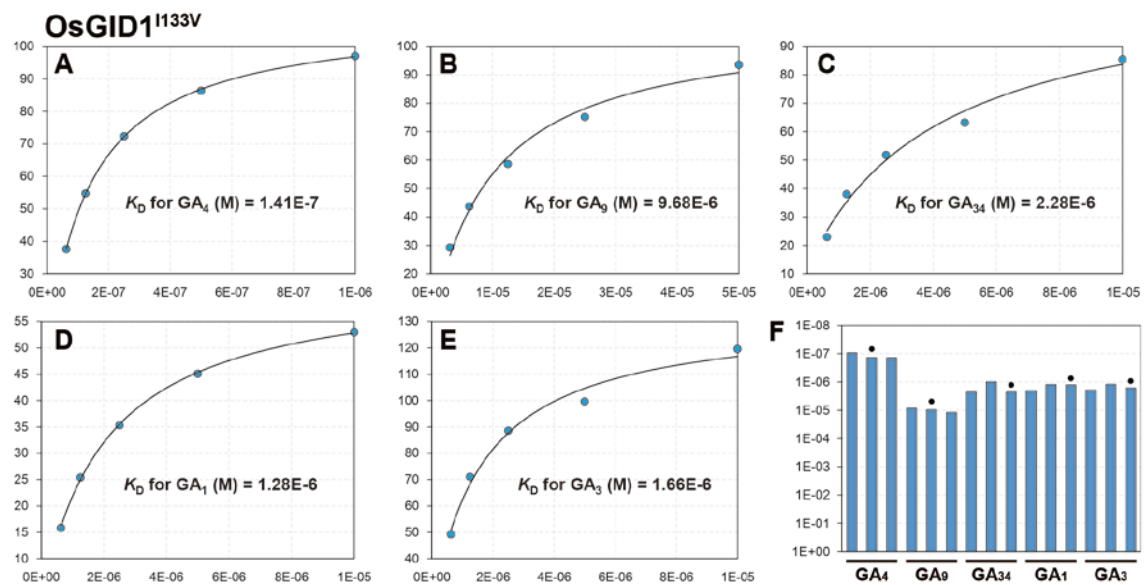

**Fig. S11** Estimation of the OsGID1<sup>I133V</sup>-SLR1 interaction affinity. Experimental conditions are the same as in *SI Appendix*, Fig. S7.

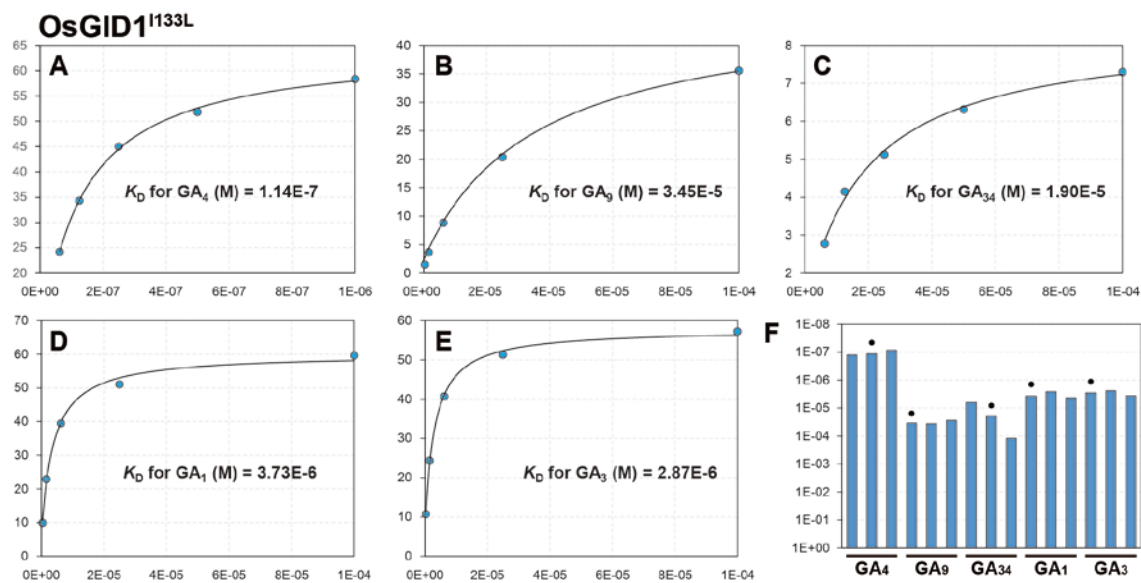

**Fig. S12.** Estimation of the OsGID1<sup>I133L</sup>-SLR1 interaction affinity. Experimental conditions are the same as in *SI Appendix*, Fig. S7.

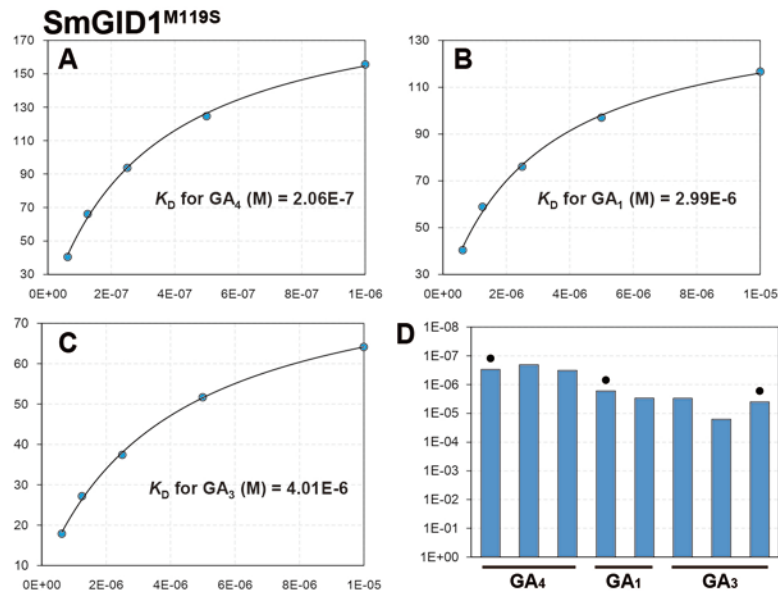

**Fig. S13.** Estimation of the SmGID1-2<sup>M119S</sup>-SmDELLA1 interaction affinity. Experimental conditions, but not the analyzed GAs, are the same as in *SI Appendix*, Fig. S7.

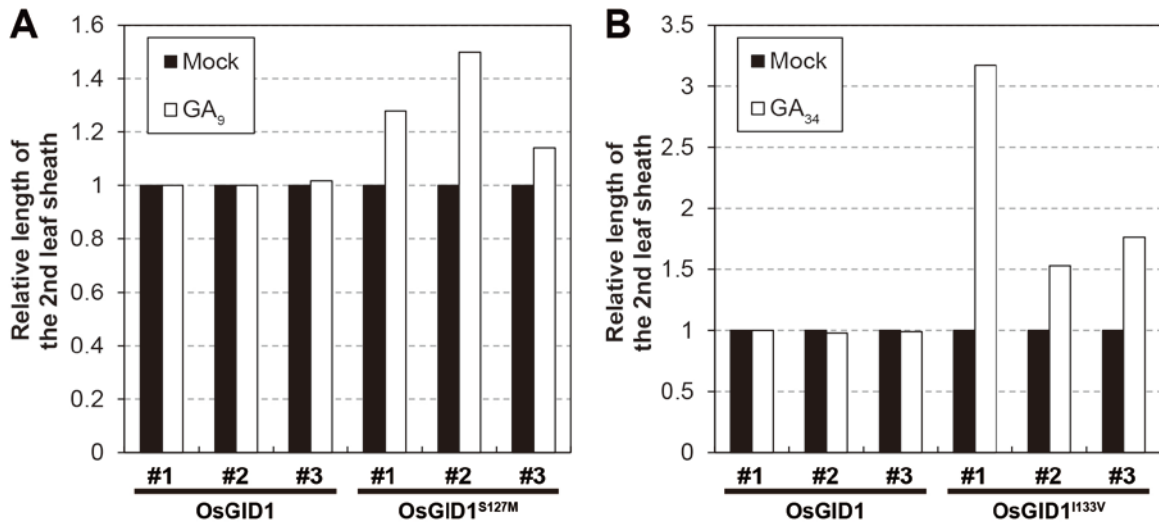

**Fig. S14.** Comparative length of the 2nd leaf sheath in rice *gid1* null plants overexpressing WT-OsGID1, OsGID1<sup>S127M</sup>, or OsGID1<sup>I133V</sup> grown in the presence or absence of 10<sup>-6</sup> M of GA<sub>9</sub> or GA<sub>34</sub>. Two plants derived from the same callus were treated, and the leaf sheath length of mock-treated plants was set to 1.



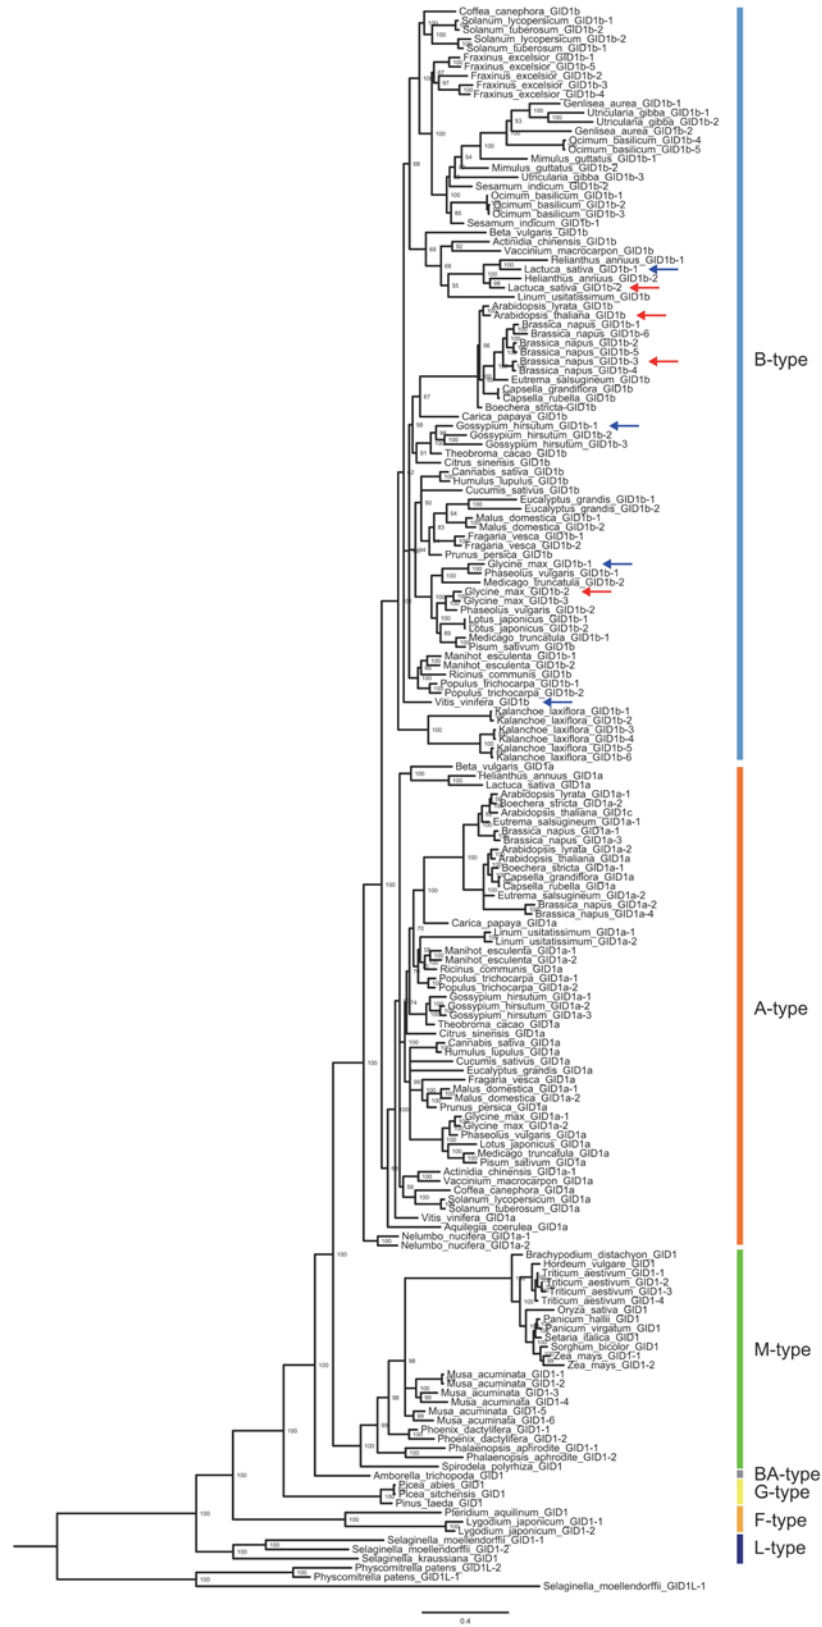

**Fig. S15.** Phylogenetic analysis of GID1s based on the alignment presented in *SI Appendix*, Dataset S3. Horizontal branch lengths are proportional to the estimated number of amino acid substitutions per residue. A-type; eudicot GID1s including AtGID1a and 1c. B-type; eudicot GID1s including AtGID1b. M-type; monocot GID1s. BA-type: basal angiosperm GID1. G-type: gymnosperm GID1s. F-type: fern GID1s. L-type: lycophyte GID1s. Branch nodes show posterior probability.

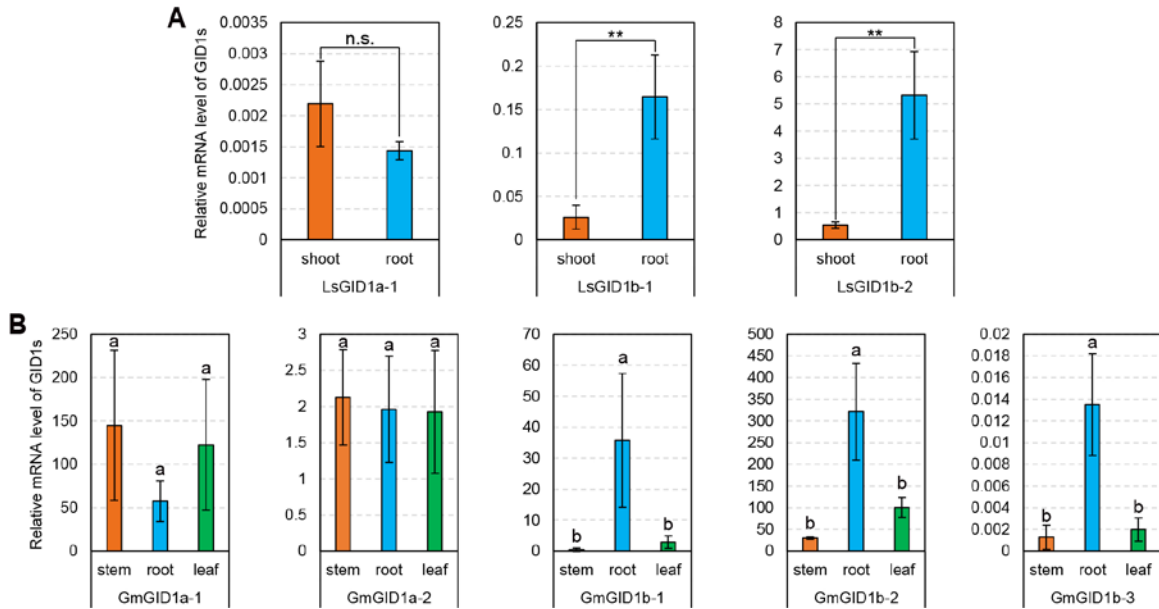

**Fig. S16.** Expression pattern of *GID1s* in various organs of lettuce (A) and soybean (B) as estimated by RT-PCR. Lettuce and soybean have one and two A-type *GID1s*, and two and three B-type *GID1s*, respectively. \*\* $P < 0.01$  based on two-sided Student's t-test, n.s.; not significant,  $P > 0.05$ . Different letters indicate significant differences at the 1% level as determined by the Tukey–Kramer test.

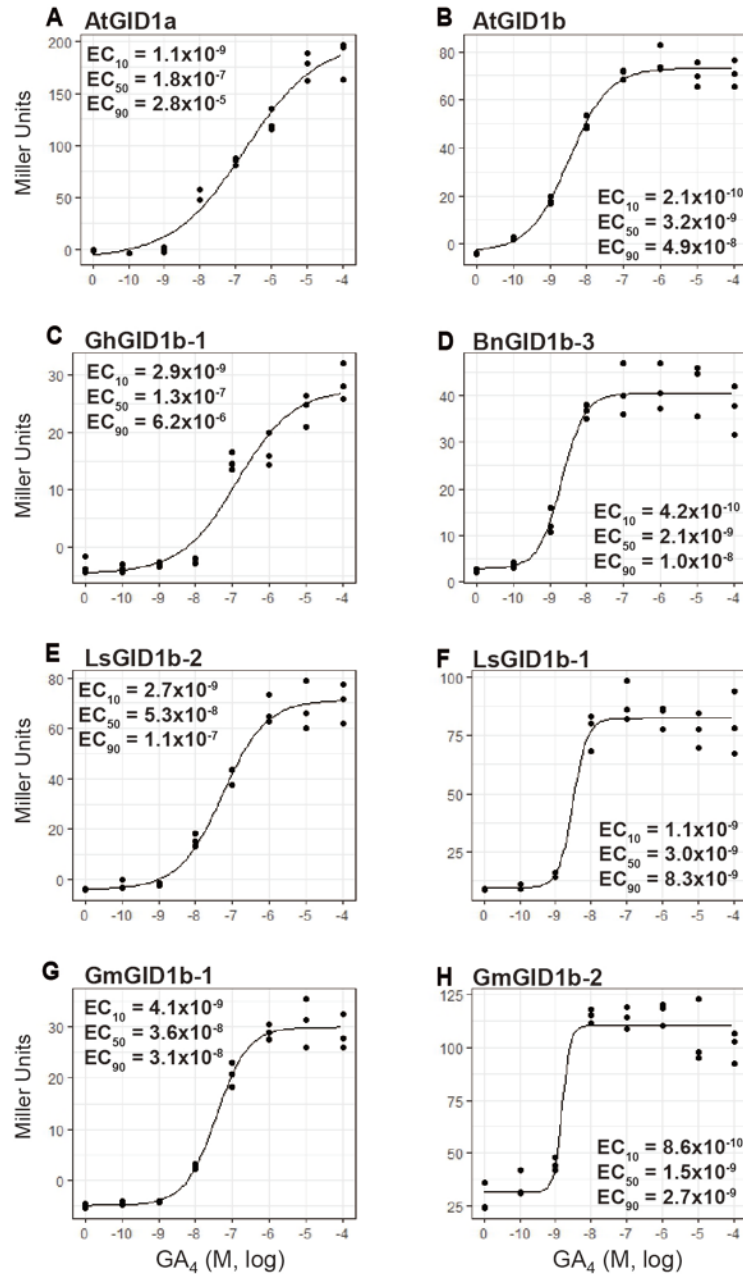

**Fig. S17.** Quantitative  $\beta$ -galactosidase assay for  $GA_4$  dose-dependence of the interactions of various eudicot GID1s with *A. thaliana* GAI in Y2H. (A) AtGID1a was used as a bait. (B) AtGID1b. (C) GhGID1b-1. (D) BnGID1b-3. (E) LsGID1b-2. (F) LsGID1b-1. (G) GmGID1b-1. (H) GmGID1b-2. Activity of  $\beta$ -galactosidase was quantified in terms of Miller Units by liquid assay. The 10%, 50%, and 90% of the maximum effective concentration of  $GA_4$  ( $EC_{10}$ ,  $EC_{50}$ ,  $EC_{90}$ , molar) are shown in the graph.  $n=3$ .



**Fig. S18.** Alignment of the loop regions of  $\beta 2$  and  $\beta 3$  of B-type GID1s. The loop region is indicated between the horizontal arrows at the top. The black box indicates the most variable region. Basic amino acids (Arg and His) in the region are indicated in red. Hypersensitive and normal B-type GID1s, which are evaluated in Fig. 3C–K, are indicated in pink and blue, respectively.

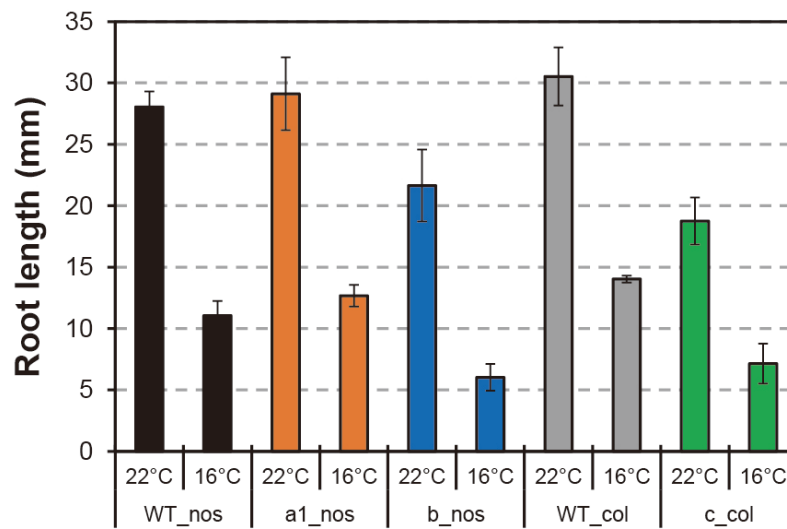

**Fig. S19.** Effect of low temperature on *A. thaliana gid1* root elongation. Relative root lengths are shown in Fig. 5F.

**Table S1.** Branch models of B-type GID1s.  $\omega$ , dN/dS ratios for clades indicated in Fig. 4A.

| Model | Hypothesis                                  | $\omega_0$ | $\omega_L$  | $\omega_K$  | $\omega_B$  |
|-------|---------------------------------------------|------------|-------------|-------------|-------------|
| One   | $\omega_0 = \omega_L = \omega_K = \omega_B$ | 0.079      | $=\omega_0$ | $=\omega_0$ | $=\omega_0$ |
| Two   | $\omega_0 \neq \omega_L$                    | 0.07522    | 0.103       | $=\omega_0$ | $=\omega_0$ |
| Two'  | $\omega_0 \neq \omega_K$                    | 0.0789     | $=\omega_0$ | 0.107       | $=\omega_0$ |
| Three | $\omega_0 \neq \omega_L \neq \omega_B$      | 0.07254    | 0.103       | $=\omega_0$ | 0.161       |

**Table S2.** Likelihood ratio tests of branch models. Four branch models shown in *SI Appendix*, Table S1 were compared. df, degrees of freedom;  $2\Delta\ln L$ , likelihood ratio test statistic.

| Model                                         | Null model                                       | df | $2\Delta\ln L$ | p-value    |
|-----------------------------------------------|--------------------------------------------------|----|----------------|------------|
| Two: $\omega_0 \neq \omega_L$                 | One: $\omega_0 = \omega_L = \omega_K = \omega_B$ | 1  | 7.632007       | 9.3481E-05 |
| Two': $\omega_0 \neq \omega_K$                | One: $\omega_0 = \omega_L = \omega_K = \omega_B$ | 1  | 0.258187       | 0.47239254 |
| Three: $\omega_0 \neq \omega_L \neq \omega_B$ | Two: $\omega_0 \neq \omega_L$                    | 1  | 15.277529      | 3.2452E-08 |

Four branch models shown in *SI Appendix*, Table S1 were compared. df, degrees of freedom;  $2\Delta\ln L$ , likelihood ratio test statistic.



**Table S3.** Primers used in the present study.

| Primer name                          | Sequence                            |
|--------------------------------------|-------------------------------------|
| Construction for rice transformation |                                     |
| mGID1-Y329F                          | GCCACGGTGGGGTTCGCCCTGTTGCCCAAC      |
| mGID1-Y329R                          | GTTGGGCAACAGGGCGAACCCACCGTGG<br>C   |
| mGID1-N225F                          | GGCAACATCCTGCTCGCCGCCATGTTCCGGC     |
| mGID1-N225R                          | GCCGAACATGGCGGCGAGCAGGATGTTGC<br>C  |
| mGID1-S198F                          | CTCTCCGGCGACGCCTCCGGCGGCAACATC      |
| mGID1-S198R                          | GATGTTGCCGCCGGAGGCGTCGCCGGAGA<br>G  |
| mGID1-S123F                          | CTTCCACGGCGGCGCCTTCGTGCACTCGTC      |
| mGID1-S123R                          | GACGAGTGACGAAGGCGCCGCCGTGGAA<br>G   |
| mGID1-R251F                          | GTGACGCTCCAGGACGCGGACTGGTACTG<br>G  |
| mGID1-R251R                          | CCAGTACCAGTCCGCGTCCTGGAGCGTCAC      |
| mGID1-D250F                          | CGTGACGCTCCAGGCCAGGACTGGTACTG       |
| mGID1-D250R                          | CAGTACCAGTCCCTGGCCTGGAGCGTCACG      |
| mGID1-Y134F                          | GCCAGCTCGACCATCGCCGACAGTCTGTGC      |
| mGID1-Y134R                          | GCACAGACTGTCGGCGATGGTTCGAGCTGG<br>C |
| mGID1-S127F                          | GGCAGCTTCGTGCACGCGTCGGCCAGCTC<br>G  |
| mGID1-S127R                          | CGAGCTGGCCGACGCGTGCACGAAGCTGC<br>C  |
| mGID1-Y31F                           | CTTCAAGCTGTCGGCCAACATTCTGCGGCG      |
| mGID1-Y31R                           | CGCCGCAGAATGTTGGCCGACAGCTTGAAG      |
| mGID1-I133F                          | GGCCAGCTCGACCGCCTACGACAGTCTGTG      |
| mGID1-I133R                          | CACAGACTGTTCGTAGGCGGTCGAGCTGGCC     |
| mGID1-L330F                          | CGGTGGGGTTCTACGCGTTGCCCAACACCG      |
| mGID1-L330R                          | CGGTGTTGGGCAACGCGTAGAACCCACCG       |
| mGID1-F27F                           | GTGCTCATCTCCAACGCCAAGCTGTTCGTAC     |
| mGID1-F27R                           | GTACGACAGCTTGGCGTTGGAGATGAGCAC      |

|                                                       |                                 |
|-------------------------------------------------------|---------------------------------|
| mGID1-V326F                                           | GAGAACGCCACGGCGGGGTTCTACCTGTTG  |
| mGID1-V326R                                           | CAACAGGTAGAACCCCGCCGTGGCGTTCTC  |
| mGID1-I24F                                            | CACACATGGGTGCTCGCCTCCAAC TTCAAG |
| mGID1-I24R                                            | CTTGAAGTTGGAGGCGAGCACCCATGTGTG  |
| mGID1-F245F                                           | CTCGACGGCAAGTACGCCGTGACGCTCCAG  |
| mGID1-F245R                                           | CTGGAGCGTCACGGCGTACTTGCCGTCGAG  |
| mGID1-V246F                                           | GGCAAGTACTTCGCGACGCTCCAGGACAGG  |
| mGID1-V246R                                           | CCTGTCCTGGAGCGTCGCGAAGTACTTGCC  |
| mGID1-Y254F                                           | CAGGACAGGGACTGGGCCTGGAAGGCGTA   |
|                                                       | C                               |
| mGID1-Y254R                                           | GTACGCCTTCCAGGCCAGTCCCTGTCCTG   |
| GID1-I133V-F                                          | GGCCAGCTCGACCGTCTACGACAGTCTGTG  |
| GID1-I133V-R                                          | CACAGACTGTCGTAGACGGTTCGAGCTGGCC |
| Construction for yeast assays                         |                                 |
| EcoRI+VvGID1b.F                                       | GGAATTCATGGCCGGGAGTGATGAAGT     |
| PAPEN+GmGID1-2.loop.R                                 | CTCTATGAACCTTCCCATATTTTCAGGCGCA |
|                                                       | GG                              |
| GmGID1-2.loop+LEKPL                                   | ATGGGAAGGTTTCATAGAGCTGGAAAAGCCC |
|                                                       | TTG                             |
| VvGID1b.R+BamHI                                       | CGGGATCCTTAACAGTTAGATTTACGA     |
| Construction for protein expression in <i>E. coli</i> |                                 |
| GID1-S127M-F                                          | CAGCTTCGTGCACATGTGCGGCCAGCTCGAC |
| GID1-S127M-R                                          | GTCGAGCTGGCCGACATGTGCACGAAGCTG  |
| GID1-I133L-F                                          | GGCCAGCTCGACCCTCTACGACAGTCTGTG  |
| GID1-I133L-R                                          | CACAGACTGTCGTAGAGGGTTCGAGCTGGCC |
| GID1-I133V-F                                          | GGCCAGCTCGACCGTCTACGACAGTCTGTG  |
| GID1-I133V-R                                          | CACAGACTGTCGTAGACGGTTCGAGCTGGCC |
| BamHI+SmDELLA1(14K125S).F                             | GCGGATCCAAGAGCCGGATGATCCCGGTAG  |
| SmDELLA1(14K125S)+EcoRI.R                             | GCGAATTCGATTCCATATCGGAGGACGAG   |
| BamHI+SmDELLA1.F                                      | GCGGATCCATGGAGGATATGGATATGCTCG  |
| SmI+T+SmGID1a.F                                       | GCCCCGGGTATGAATTCCTGTAGCAAG     |
| SmI+T+SmGID1b.F                                       | GGCCCCGGGTATGGAACCGGAGGAGGAT    |

|                        |                                |
|------------------------|--------------------------------|
| SmGID1a.R+Sall         | GCGTCGACTCACGTCGAGGAATCCATG    |
| SmGID1b.R+Sall         | GCGTCGACCTACGTTGTTGTCCTGCGA    |
| SmGID1bM120S.f         | CAGCTTCGTGCACTCGTCCGCTAACAGTGC |
| SmGID1bM120S.r         | GCACTGTTAGCGGACGAGTGCACGAAGCTG |
| qRT-PCR                |                                |
| Ls.Ubiquitin-protein.F | TCTTAGATCACCGTCCCATCGT         |
| Ls.Ubiquitin-protein.R | TCTGAGATTGTCCGAGGATATGAG       |
| LsGID1a.RT1.F          | CCAAATTAACGTCTGCGAATC          |
| LsGID1a.RT1.R          | GCCGGAGAAGGTTGTAAGC            |
| LsGID1bc.RT1.2.F       | AAGCAGGGCAAGACGTGAAG           |
| LsGID1bc.RT1.3.R       | GCGAGACTCAACGAACAAACC          |
| LsGID1ac.RT1.F         | TAGTGGTGGTGGCCGGATTAG          |
| LsGID1ac.RT1.3.R       | ACTTGTTGCCCTGCGTTTTC           |
| GmRPL30.RT.F           | CAATGCTGCACTTAATTTTTGCCG       |
| GmRPL30.RT.R           | GAAGAACACATCATTACATTAAT        |
| GmGID1a-1.RT2.F        | CATTCCTATGTCTTGGGTTGG          |
| GmGID1a-1.RT2.R        | AACATTGCTGCGGAAAAGAC           |
| GmGID1a-2.RT1.F        | ACGACAAGTGGGCGTTAGAA           |
| GmGID1a-2.RT1.R        | AATAGCGGGAGCAAAGTCCT           |
| GmGID1b-1.RT1.F        | CTGGGGACTACTGCTTCCTG           |
| GmGID1b-1.RT1.R        | CCCAAATGAACCGAGTTCTG           |
| GmGID1b-2.RT2.F        | TGGCTGAAGCAACGTAAATG           |
| GmGID1b-2.RT2.R        | AAGCGATAAGCCAAGCCATA           |
| GmGID1b-3.RT1.F        | CTTCCTGTGCTGTGCTCAAA           |
| GmGID1b-3.RT1.R        | CTTCAGCCAAACCCCACTAA           |

**Dataset S1.**

Amino acid alignment of GID1s and GID1-like CXEs for the phylogenetic analysis presented in *SI Appendix*, Fig. S1. GID1s or GID1-like CXEs in clade IV are indicated in red and grey, respectively, whereas five GID1-like CXEs used for the alignment in *SI Appendix*, Fig. S2 are marked by red dots. Six non-polar amino acids of OsGID1 replaced with Ala or Ser in *SI Appendix*, Fig. S4 and the corresponding residues of GID1-like CXEs are indicated in red. Y134 of OsGID1 and the corresponding residues of GID1-like CXEs are indicated in yellow.

**Dataset S2.**

*CXE* and *GID1* genes used in the present study.

**Dataset S3.**

Amino acid alignment of 169 GID1s from various plant species for the phylogenetic analysis presented in *SI Appendix*, Fig. S15.

**Dataset S4.**

Amino acid alignment of 83 B-type GID1s for the phylogenetic analysis presented in Fig. 4A.
